# Supplementary material
Source: PubMed Central journal article supplement (PMC3754148)
Supplement: AEM.00845-13_zam999104621so1.pdf [file AEM.00845-13_zam999104621so1.pdf]

1 Table S1: Strains, plasmids and primers used in this study

| Designation                             | Relevant characteristics or sequences (5' to 3') <sup>a</sup>                                 | Reference or source |
|-----------------------------------------|-----------------------------------------------------------------------------------------------|---------------------|
| <b>Strains</b>                          |                                                                                               |                     |
| <i>Erwinia amylovora</i> 273            | Wild type strain of <i>Erwinia amylovora</i> 273 isolated from apple orchards of New York     | (1)                 |
| <i>Agrobacterium tumefaciens</i> GV3101 | Wild type, Rif <sup>r</sup> Gm <sup>r</sup>                                                   | (2)                 |
| <b>Plasmids</b>                         |                                                                                               |                     |
| pPROBE-AT                               | Long life GFP Promoter-probe vector, Ap <sup>r</sup>                                          | (3)                 |
| pPROBE-gfp[AAV]                         | Short life GFP Promoter-probe vector, Km <sup>r</sup>                                         | (3)                 |
| pCPP5247                                | pLN314 expressing HopQ1, Cm <sup>r</sup>                                                      | (2)                 |
| phrpA                                   | pPROBE-gfp[AAV] derivative with PCR fragment containing <i>hrpA</i> promoter, Km <sup>r</sup> | This study          |
| phrpL                                   | pPROBE-AT derivative with PCR fragment containing <i>hrpL</i> promoter, Km <sup>r</sup>       | This study          |
| phrpS                                   | pPROBE-AT derivative with PCR fragment containing <i>hrpS</i> promoter, Ap <sup>r</sup>       | This study          |
| <b>Primers</b>                          |                                                                                               |                     |
| Promoter cloning                        |                                                                                               |                     |
| <i>hrpA</i> forward                     | ATATGGATCCCGATAAAGAGCAGCGTAG                                                                  | This study          |
| <i>hrpA</i> reverse                     | ATTAGAATTCCTTAGACGCCTGAGCATTG                                                                 | This study          |
| <i>hrpL</i> forward                     | ATATGGATCCAATATGTTGCTGCGCTCGG                                                                 | This study          |
| <i>hrpL</i> reverse                     | ATTAGAA TTC AAATGATGCACGCGTCG                                                                 | This study          |
| <i>hrpS</i> forward                     | ATATGGATCCTTGTGGAGTGTAACCGC                                                                   | This study          |
| <i>hrpS</i> reverse                     | ATTAGAATTC AACC GCGACCAATTTCC                                                                 | This study          |
| Northern blot                           |                                                                                               |                     |
| <i>hrpA</i> forward                     | GCGGCATTATTACAGGTATGGC                                                                        | This study          |

|                                  |                                 |            |
|----------------------------------|---------------------------------|------------|
| <i>hrpA</i> reverse              | GA <u>ACT</u> GAATAGCTTTAGCCGCG | This study |
| <i>hrpL</i> forward              | GTCAACGATGGGCTACCGC             | This study |
| <i>hrpL</i> reverse              | CTGTTTCAGCGTGACGCG              | This study |
| <i>hrpN</i> forward              | AGTCTGAATACAAGTGGGCTGGG         | This study |
| <i>hrpN</i> reverse              | CGCCCAGCTTGCCAA                 | This study |
| <i>rsmB<sub>Ea</sub></i> forward | TGCTCCCTGCTCATCCTTGA            | This study |
| <i>rsmB<sub>Ea</sub></i> reverse | CAGGAAGAGGTCAGGAACATCTCCAGG     | This study |
| <i>rsmA<sub>Ea</sub></i> forward | TCGTTCGAGTTGGTGAAACCC           | This study |
| <i>rsmA<sub>Ea</sub></i> reverse | GTA <u>ACT</u> CGTTTGCTGCGTCT   | This study |
| qPCR                             |                                 |            |
| <i>rplU</i> forward              | ACAACACCGAGTAAGCGAAGGTCA        | This study |
| <i>rplU</i> reverse              | GCTTTAATCACGCCGCCTGAAACT        | This study |
| <i>hrpS</i> forward              | ATATGCGTGTCATTGTTCGCAACGC       | This study |
| <i>hrpS</i> reverse              | CGCCCGTAAAGGTTGCAGTTGAAT        | This study |
| <i>rpoN</i> forward              | TGGTGAAAAAGTTAGTCTCGG           | This study |
| <i>rpoN</i> reverse              | CTGTTTACGCTGATTCGATG            | This study |
| <i>hrpX</i> forward              | GAGCCGCTCAAATTGCTCGAGTTT        | This study |
| <i>hrpX</i> reverse              | ATCATTGCGATAGCCCAACATGCG        | This study |
| <i>hrpY</i> forward              | GACCCGGAGACGTTGCTGGC            | This study |
| <i>hrpY</i> reverse              | AACCCCTCTGCCACGCGCTA            | This study |

2 <sup>a</sup>Underlined bases indicate restriction sites in the primers. Ap<sup>r</sup>, Cm<sup>r</sup>, Gm<sup>r</sup>, Km<sup>r</sup> and Rif<sup>r</sup> indicate  
3 ampicillin, chloramphenicol, gentamycin, kanamycin and rifampicin resistance respectively.

4

5 Supplementary References:

- 6 1) **Bogdanove, A. J., J. F. Kim, Z. Wei, P. Kolchinsky, A. O. Charkowski, A. K. Conlin,**  
7 **A. Collmer, and S. V. Beer.** 1998. Homology and functional similarity of an *hrp*-linked  
8 pathogenicity locus, *dspEF*, of *Erwinia amylovora* and the avirulence locus *avrE* of  
9 *Pseudomonas syringae* pv *tomato*. Proc. Natl. Acad. Sci. U.S.A. **95**:1325-1330.

- 10        2) **Badel, J. L., R. Shimizu, H. S. Oh, and A. Collmer.** 2006. A *Pseudomonas syringae*  
11            *pv. tomato avrE1/hopM1* mutant is severely reduced in growth and lesion formation in  
12            tomato. *Mol. Plant-Microbe Interact.* **19**:99-111.
- 13        3) **Miller, W. G., J. H. Leveau, and S. E. Lindow.** 2000. Improved *gfp* and *inaZ* broad-  
14            host-range promoter-probe vectors. *Mol. Plant-Microbe Interact.* **13**:1243-1250.
- 15
