# Supplementary material
Source: PubMed Central journal article supplement (PMC3754148)
Supplement: AEM.00845-13_zam999104621so2.pdf [file AEM.00845-13_zam999104621so2.pdf]

1 Table S2: Growth of *E. amylovora* in HIM supplemented with 100μM of the inhibitors or  
 2 inducers.

| Inhibitors                                                             | Absorbance (OD <sub>590</sub> ) <sup>a</sup> |            |            |            |            |            |
|------------------------------------------------------------------------|----------------------------------------------|------------|------------|------------|------------|------------|
|                                                                        | Compounds                                    | 3hrs       | 6hrs       | 9hrs       | 12hrs      | 24hrs      |
| DMSO                                                                   |                                              | 0.24±0.001 | 0.40±0.002 | 0.42±0.004 | 0.50±0.010 | 0.75±0.005 |
| TS1, <i>trans</i> -cinnamic acid                                       |                                              | 0.24±0.001 | 0.40±0.005 | 0.41±0.001 | 0.49±0.003 | 0.74±0.010 |
| TS6, ortho - coumaric acid                                             |                                              | 0.23±0.002 | 0.39±0.002 | 0.41±0.004 | 0.49±0.006 | 0.70±0.007 |
| TS8, hydrocinnamic acid                                                |                                              | 0.24±0.003 | 0.42±0.002 | 0.44±0.004 | 0.51±0.007 | 0.77±0.006 |
| TS9, phenoxyacetic acid                                                |                                              | 0.25±0.006 | 0.41±0.003 | 0.43±0.004 | 0.48±0.009 | 0.72±0.008 |
| TS10, <i>trans</i> -2-phenylcyclopropane-1-carboxylic acid             |                                              | 0.26±0.012 | 0.45±0.001 | 0.45±0.001 | 0.55±0.006 | 0.74±0.007 |
| TS11, <i>trans</i> -3-(2-thienyl)acrylic acid                          |                                              | 0.25±0.001 | 0.43±0.000 | 0.43±0.006 | 0.51±0.005 | 0.75±0.006 |
| TS12*, <i>trans</i> -3-indoleacrylic acid                              |                                              | 0.18±0.001 | 0.33±0.003 | 0.36±0.003 | 0.43±0.002 | 0.62±0.006 |
| TS13, <i>trans</i> -3-(3-pyridyl)acrylic acid                          |                                              | 0.25±0.002 | 0.41±0.002 | 0.42±0.003 | 0.46±0.004 | 0.70±0.002 |
| TS15, <i>trans</i> -2-methoxycinnamic acid                             |                                              | 0.25±0.002 | 0.42±0.003 | 0.44±0.001 | 0.51±0.007 | 0.70±0.003 |
| TS16, <i>trans</i> -3-methoxycinnamic acid                             |                                              | 0.25±0.002 | 0.42±0.001 | 0.45±0.003 | 0.52±0.003 | 0.70±0.008 |
| TS17, <i>trans</i> -4-methoxycinnamic acid                             |                                              | 0.25±0.001 | 0.42±0.003 | 0.44±0.003 | 0.51±0.003 | 0.73±0.003 |
| TS18, <i>trans</i> -2-methylcinnamic acid                              |                                              | 0.25±0.002 | 0.43±0.003 | 0.44±0.006 | 0.50±0.008 | 0.70±0.005 |
| TS19, <i>trans</i> -3-methylcinnamic acid                              |                                              | 0.25±0.001 | 0.44±0.003 | 0.45±0.000 | 0.50±0.010 | 0.71±0.005 |
| TS20, <i>trans</i> -4-methylcinnamic acid                              |                                              | 0.25±0.002 | 0.43±0.001 | 0.43±0.003 | 0.50±0.003 | 0.67±0.010 |
| TS21, <i>trans</i> -2-chlorocinnamic acid                              |                                              | 0.26±0.002 | 0.45±0.006 | 0.47±0.002 | 0.51±0.001 | 0.71±0.006 |
| TS22, <i>trans</i> -3-chlorocinnamic acid                              |                                              | 0.26±0.003 | 0.44±0.001 | 0.45±0.003 | 0.50±0.007 | 0.68±0.013 |
| TS23, <i>trans</i> -4-chlorocinnamic acid                              |                                              | 0.25±0.000 | 0.44±0.003 | 0.45±0.006 | 0.51±0.012 | 0.72±0.001 |
| TS24, <i>trans</i> -2-carboxycinnamic acid                             |                                              | 0.26±0.003 | 0.45±0.002 | 0.46±0.007 | 0.51±0.001 | 0.77±0.012 |
| DMSO                                                                   |                                              | 0.26±0.000 | 0.36±0.003 | 0.44±0.003 | 0.51±0.004 | 0.70±0.009 |
| TS25, <i>trans</i> -cinnamamide                                        |                                              | 0.27±0.002 | 0.36±0.003 | 0.44±0.003 | 0.50±0.000 | 0.72±0.007 |
| TS26, <i>trans</i> -4-mercaptocinnamic acid                            |                                              | 0.27±0.002 | 0.37±0.001 | 0.45±0.002 | 0.54±0.003 | 0.81±0.005 |
| TS27, <i>trans</i> -4-aminocinnamic acid                               |                                              | 0.27±0.002 | 0.36±0.003 | 0.44±0.001 | 0.54±0.004 | 0.74±0.006 |
| TS28*, <i>trans</i> -4-nitrocinnamic acid                              |                                              | 0.25±0.001 | 0.35±0.003 | 0.40±0.002 | 0.46±0.004 | 0.57±0.003 |
| TS29, <i>trans</i> -4-formlycinnamic acid                              |                                              | 0.28±0.003 | 0.41±0.003 | 0.49±0.001 | 0.55±0.002 | 0.72±0.005 |
| TS33, salicylic acid                                                   |                                              | 0.26±0.002 | 0.36±0.001 | 0.46±0.001 | 0.55±0.002 | 0.79±0.008 |
| TS34, benzoic acid                                                     |                                              | 0.26±0.001 | 0.36±0.001 | 0.46±0.003 | 0.53±0.006 | 0.79±0.009 |
| TS35, 3-(2-naphthyl) acrylic acid                                      |                                              | 0.28±0.004 | 0.37±0.003 | 0.46±0.004 | 0.53±0.008 | 0.76±0.010 |
| TS103, <i>trans</i> -4-hydroxycinnamohydroxamic acid                   |                                              | 0.25±0.004 | 0.37±0.002 | 0.49±0.002 | 0.56±0.005 | 0.66±0.008 |
| TS105, <i>trans</i> -2-(4-methoxyphenyl)-1-cyclopropanecarboxylic acid |                                              | 0.28±0.000 | 0.38±0.003 | 0.48±0.004 | 0.56±0.009 | 0.74±0.008 |
| TS108, <i>trans</i> -4-phenylcinnamic acid                             |                                              | 0.28±0.001 | 0.37±0.002 | 0.48±0.004 | 0.52±0.004 | 0.71±0.008 |
| TS109, <i>trans</i> -4-chlorocinnamide                                 |                                              | 0.30±0.009 | 0.41±0.010 | 0.49±0.013 | 0.60±0.016 | 0.76±0.013 |
| TS110, <i>trans</i> -4-fluorocinnamic acid                             |                                              | 0.26±0.002 | 0.36±0.002 | 0.43±0.002 | 0.53±0.003 | 0.72±0.004 |
| TS112, <i>trans</i> -4-dimethylaminocinnamic acid                      |                                              | 0.27±0.002 | 0.37±0.003 | 0.46±0.003 | 0.52±0.009 | 0.72±0.014 |
| TS113, <i>trans</i> -4-trifluoromethylcinnamic                         |                                              | 0.27±0.000 | 0.38±0.002 | 0.46±0.006 | 0.53±0.002 | 0.75±0.005 |

|                                                                                 |            |            |            |            |            |
|---------------------------------------------------------------------------------|------------|------------|------------|------------|------------|
| acid                                                                            |            |            |            |            |            |
| TS119, <i>trans</i> -4-methoxycinnamylamine                                     | 0.27±0.002 | 0.39±0.005 | 0.48±0.006 | 0.55±0.011 | 0.78±0.012 |
| TS124, <i>trans</i> -4-hydroxymethylcinnamic acid                               | 0.27±0.002 | 0.38±0.002 | 0.46±0.000 | 0.55±0.003 | 0.71±0.010 |
| TS125, <i>trans</i> -4-methoxycinnamohydroxamic acid                            | 0.25±0.002 | 0.36±0.001 | 0.46±0.001 | 0.54±0.004 | 0.74±0.003 |
| DMSO                                                                            | 0.20±0.002 | 0.28±0.004 | 0.34±0.001 | 0.39±0.003 | 0.60±0.007 |
| TS126, <i>trans</i> -4-methoxycinnamyl alcohol                                  | 0.20±0.001 | 0.28±0.003 | 0.34±0.006 | 0.39±0.003 | 0.60±0.014 |
| TS127, <i>trans</i> -3-indoleacrylohydroxamic acid                              | 0.17±0.001 | 0.24±0.003 | 0.30±0.003 | 0.33±0.001 | 0.43±0.003 |
| TS128*, <i>trans</i> -4-bromocinnamohydroxamic acid                             | 0.15±0.000 | 0.16±0.002 | 0.17±0.001 | 0.17±0.001 | 0.19±0.002 |
| TS129, <i>trans</i> -2-hydroxycinnamohydroxamic acid                            | 0.17±0.001 | 0.26±0.001 | 0.37±0.024 | 0.39±0.004 | 0.47±0.006 |
| TS130*, <i>trans</i> -3-hydroxycinnamohydroxamic acid                           | 0.18±0.001 | 0.26±0.001 | 0.33±0.002 | 0.38±0.002 | 0.46±0.002 |
| TS132, <i>trans</i> -cinnamohydroxamic acid                                     | 0.17±0.000 | 0.24±0.001 | 0.30±0.001 | 0.34±0.001 | 0.53±0.007 |
| TS135, salicylhydroxamic acid                                                   | 0.19±0.003 | 0.27±0.001 | 0.33±0.004 | 0.36±0.002 | 0.57±0.004 |
| TS136, phenylpropionic acid                                                     | 0.20±0.002 | 0.27±0.002 | 0.33±0.002 | 0.37±0.002 | 0.57±0.002 |
| TS139, 3-phenylpropionohydroxamic acid                                          | 0.19±0.002 | 0.28±0.003 | 0.34±0.005 | 0.38±0.003 | 0.59±0.007 |
| TS140, <i>trans</i> -4-phenylcinnamohydroxamic acid                             | 0.22±0.005 | 0.28±0.001 | 0.32±0.003 | 0.36±0.004 | 0.51±0.005 |
| TS141*, <i>trans</i> -4-fluorocinnamohydroxamic acid                            | 0.18±0.004 | 0.23±0.001 | 0.28±0.000 | 0.32±0.002 | 0.49±0.006 |
| TS142, <i>trans</i> -4-methylcinnamohydroxamic acid                             | 0.19±0.002 | 0.27±0.004 | 0.33±0.003 | 0.38±0.004 | 0.61±0.008 |
| TS143*, 2-phenoxyacetohydroxamic acid                                           | 0.18±0.001 | 0.24±0.003 | 0.28±0.002 | 0.30±0.002 | 0.48±0.003 |
| TS144, 4-hydroxybenzoic acid                                                    | 0.19±0.001 | 0.27±0.001 | 0.33±0.003 | 0.38±0.002 | 0.61±0.013 |
| TS145, 3-hydroxybenzoic acid                                                    | 0.20±0.000 | 0.28±0.001 | 0.34±0.004 | 0.38±0.002 | 0.59±0.005 |
| TS146, <i>trans</i> -4-formylcinnamohydroxamic acid                             | 0.19±0.001 | 0.27±0.002 | 0.34±0.003 | 0.38±0.002 | 0.59±0.005 |
| TS147, <i>trans</i> -4-hydroxymethylcinnamohydroxamic acid                      | 0.20±0.001 | 0.26±0.002 | 0.33±0.003 | 0.39±0.002 | 0.58±0.005 |
| DMSO                                                                            | 0.23±0.004 | 0.38±0.004 | 0.48±0.006 | 0.55±0.007 | 0.86±0.006 |
| TS160*, <i>trans</i> -2-methylcinnamohydroxamic acid                            | 0.19±0.000 | 0.27±0.001 | 0.35±0.006 | 0.40±0.003 | 0.67±0.001 |
| TS161, <i>trans</i> -3-(2-thienyl)acrylhydroxamic acid                          | 0.23±0.001 | 0.36±0.003 | 0.47±0.002 | 0.55±0.004 | 0.86±0.003 |
| TS165, <i>trans</i> -2-[(4'-benzylcarbonyl]phenylcyclopropane-1-carboxylic acid | 0.23±0.001 | 0.40±0.004 | 0.51±0.003 | 0.61±0.001 | 0.85±0.013 |

---

**Inducers**

|                                                                          |            |            |            |            |            |
|--------------------------------------------------------------------------|------------|------------|------------|------------|------------|
| DMSO                                                                     | 0.17±0.001 | 0.26±0.001 | 0.30±0.003 | 0.34±0.000 | 0.52±0.004 |
| TS002, 2,4-dihydroxycinnamic acid                                        | 0.18±0.000 | 0.26±0.001 | 0.31±0.004 | 0.35±0.004 | 0.54±0.004 |
| TS101, methyl para-coumate                                               | 0.17±0.001 | 0.26±0.004 | 0.31±0.000 | 0.34±0.001 | 0.54±0.013 |
| TS106, ethyl <i>trans</i> -2-(4-hydroxyphenyl)-1-cyclopropanecarboxylate | 0.18±0.002 | 0.25±0.002 | 0.31±0.002 | 0.35±0.002 | 0.55±0.001 |
| TS107, <i>trans</i> -2-(4-hydroxyphenyl)-1-cyclopropanecarboxylic acid   | 0.18±0.002 | 0.26±0.003 | 0.31±0.001 | 0.35±0.001 | 0.55±0.006 |
| TS114, diethyl <i>trans</i> -2-(4-hydroxyphenyl)-vinylphosphonate        | 0.18±0.002 | 0.27±0.005 | 0.32±0.003 | 0.35±0.003 | 0.55±0.006 |
| TS122, ethyl <i>trans</i> -2-(4-hydroxyphenyl)-ethenylsulfonate          | 0.18±0.001 | 0.26±0.001 | 0.31±0.001 | 0.35±0.003 | 0.56±0.002 |
| TS133, <i>trans</i> -3-(4-hydroxyphenyl)acrylohydrazide                  | 0.18±0.001 | 0.26±0.002 | 0.30±0.000 | 0.36±0.005 | 0.54±0.001 |
| TS138, N-(2-hydroxyethyl)-4-hydroxycinnamamide                           | 0.20±0.016 | 0.26±0.001 | 0.30±0.001 | 0.34±0.002 | 0.51±0.003 |

---

3 <sup>a</sup> indicates the standard deviation for the absorbance values. Asterisk indicates the compounds

4 that affected the growth rate of Ea273.

5

6

7

8

9

10

11

12

13

14

15

16

17

18
