# Supplementary material
Source: PubMed Central journal article supplement (PMC3754148)
Supplement: AEM.00845-13_zam999104621so3.pdf [file AEM.00845-13_zam999104621so3.pdf]

1 Figure S1

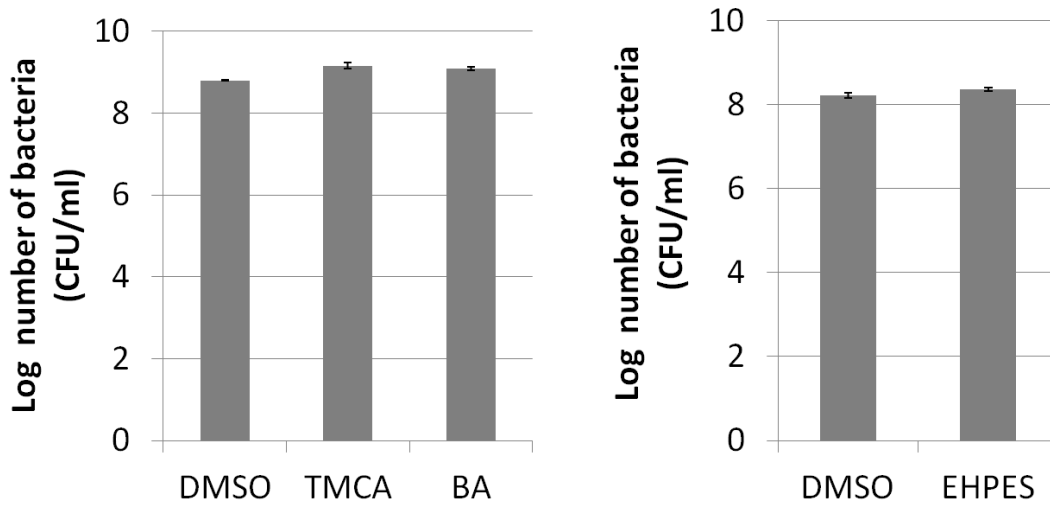

2

3 Supplementary figure 1: Comparison of number of *E. amylovora* cells carrying promoter-  
4 reporter fusion plasmid at 9 hours of growth in HIM supplemented with DMSO or 100 $\mu$ M of  
5 TMCA, BA or EHPES by serial dilution plating method.

6
